# Supplementary material for: Potential immunomodulatory effects of CAS+IMD monoclonal antibody cocktail in hospitalized patients with COVID-19
Source: PubMed Central journal article supplement — eBioMedicine. 2024 Sep 12;108:105334. doi: 10.1016/j.ebiom.2024.105334 (PMC11415811; doi:10.1016/j.ebiom.2024.105334), 2024-09-12
Supplement: mmc6.pdf [file mmc6.pdf]

## Supplementary Information

### Potential Immunomodulatory Effects of CAS+IMD Monoclonal Antibody Cocktail in Hospitalized Patients with COVID-19

5 **Authors:** Bei Wang<sup>1</sup>, Jacquelynn Golubov<sup>1</sup>, Erin M. Oswald<sup>‡</sup>, Patrick Poon<sup>1</sup>, Qiaozhi Wei<sup>1</sup>,  
Clarissa Lett<sup>1</sup>, Fadi Shehadeh<sup>2,3</sup>, Matthew Kaczynski<sup>2</sup>, Lewis Oscar Felix<sup>2,3</sup>, Biswajit Mishra<sup>2,3</sup>,  
Evangelia K. Mylona<sup>2,3</sup>, Matthew F. Wipperman<sup>1</sup>, Erica Chio<sup>1</sup>, Sara C. Hamon<sup>1</sup>, Andrea T.  
Hooper<sup>1</sup>, Selin Somersan-Karakaya<sup>1</sup>, Bret J. Musser<sup>1</sup>, Christopher D. Petro<sup>1</sup>, Jennifer D.  
10 Hamilton<sup>1</sup>, Matthew A. Sleeman<sup>1</sup>, George D Kalliolias<sup>1</sup>, Eleftherios Mylonakis<sup>2,3</sup>, Dimitris  
Skokos<sup>1\*</sup>

#### Affiliations:

<sup>1</sup>Regeneron Pharmaceuticals, Inc. Tarrytown, New York, NY 10591, USA

<sup>2</sup>Division of Infectious Diseases, Department of Medicine, The Brown Alpert Medical School and The Miriam Hospital, Providence, RI, USA.

15 <sup>3</sup>Department of Medicine, Department of Medicine, Houston Methodist Academic Institute, Houston, TX 77030.

<sup>‡</sup>Former employee of Regeneron

\*Corresponding authors. Email: Dimitris.Skokos@regeneron.com

20

## Supplementary Figures

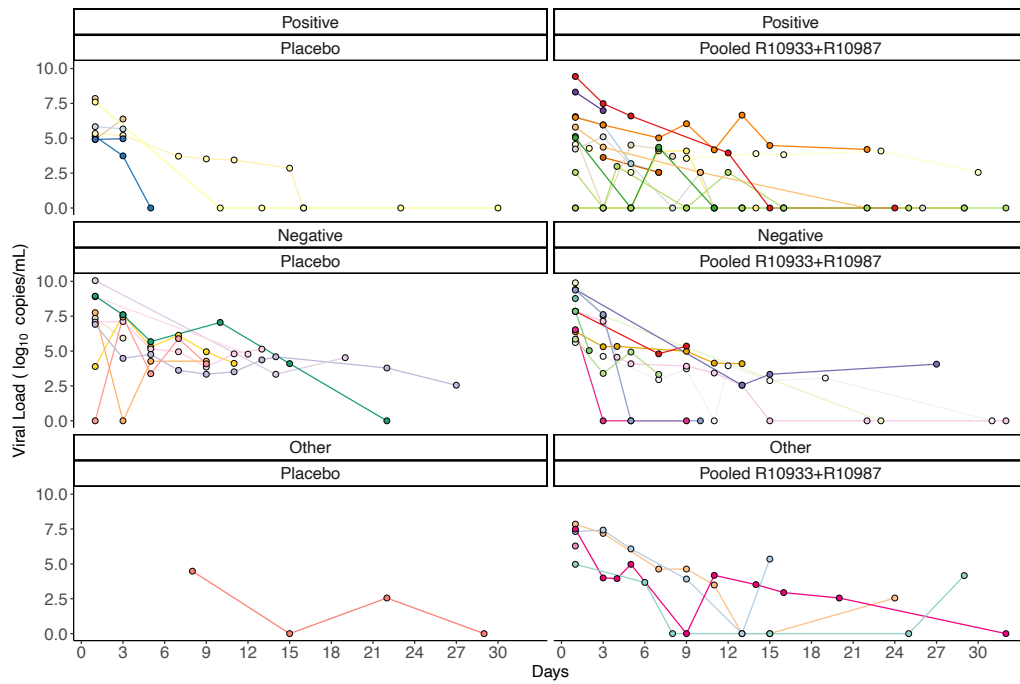

**fig S1: Longitudinal viral load changes in patients with different baseline serostatus and treatment.** Viral load from patients with different baseline serostatus and treatment group. Lines connecting samples collected from the same individual. All patients were assessed prior to dosing for baseline viral load in nasopharyngeal swabs and anti-SARS-CoV-2 antibodies. Briefly, Anti-spike (S1) immunoglobulin (Ig) A (EUROIMMUNE), anti-S1 IgG (EUROIMMUN), and anti-nucleocapsid IgG (Abbott) were accessed using the cut-offs for negative, positive, or borderline as defined per manufacturer’s instructions for use. For patients with board line or missing data, they are categorized as “other” in this study.

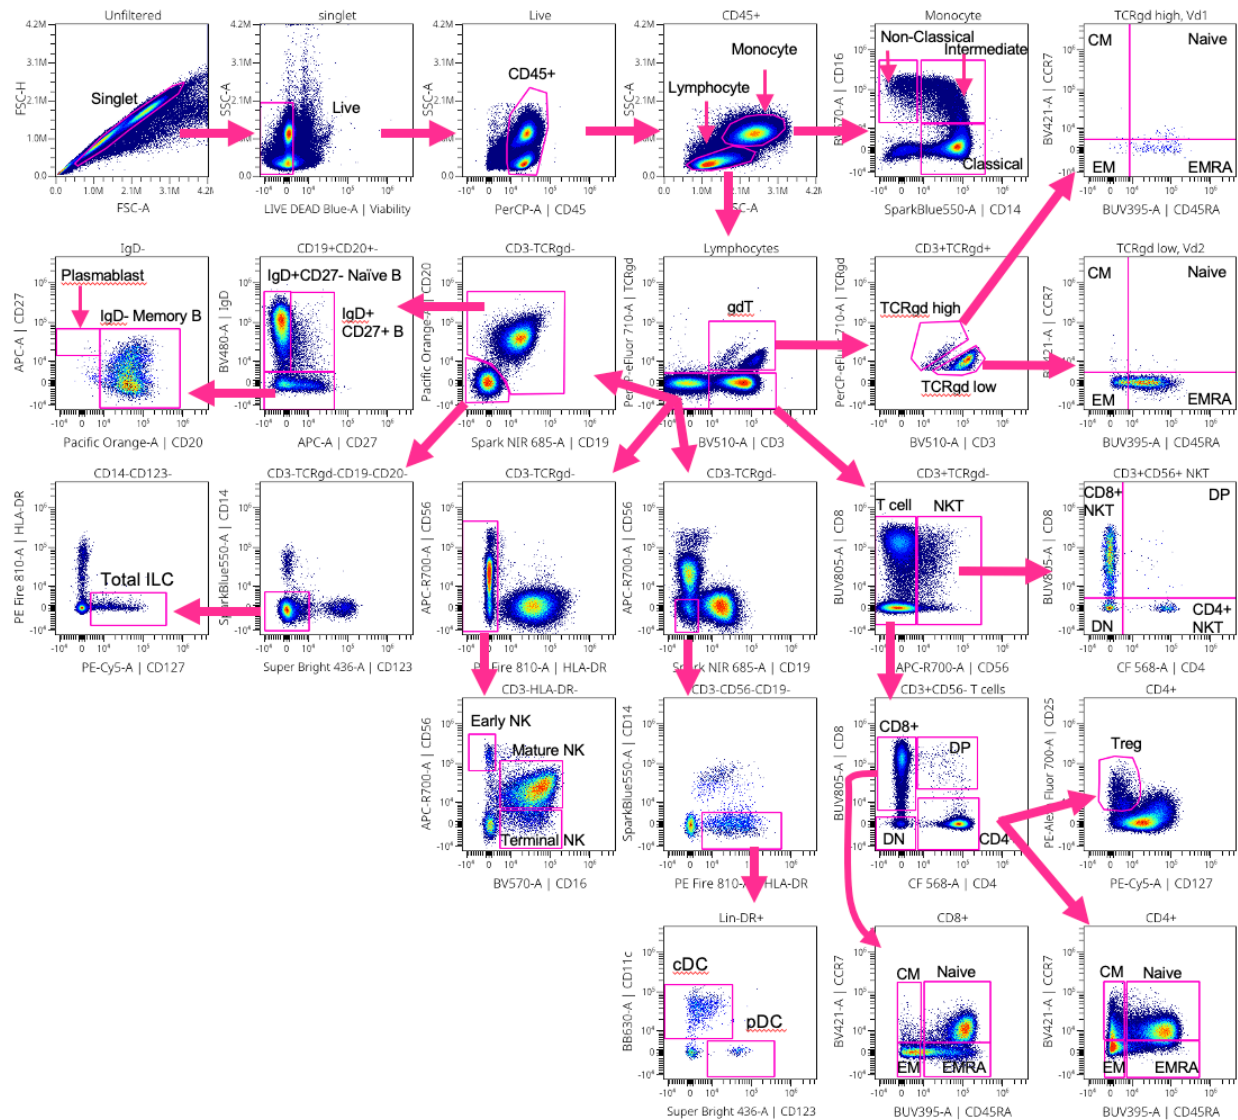

**fig S2: Manual flow cytometry gating strategy to identify major immune cell subsets.** Flow cytometry data from one patient post Ab treatment with well-representing cell populations was selected and shown here for gating strategy. Arrows connecting parental gate and child gates. Abbreviations: gdT, gamma delta T cells; CM, central memory; EM, effector memory; EMRA, effector memory cells that re-express CD45RA. ILC, innate lymphoid cells; NK, natural killer cells; NKT, natural killer T cells; DP, double positive cells; DN, double negative cells; Treg, regulatory T cells; cDC, classical dendritic cells; pDC, plasmacytoid dendritic cells.

5

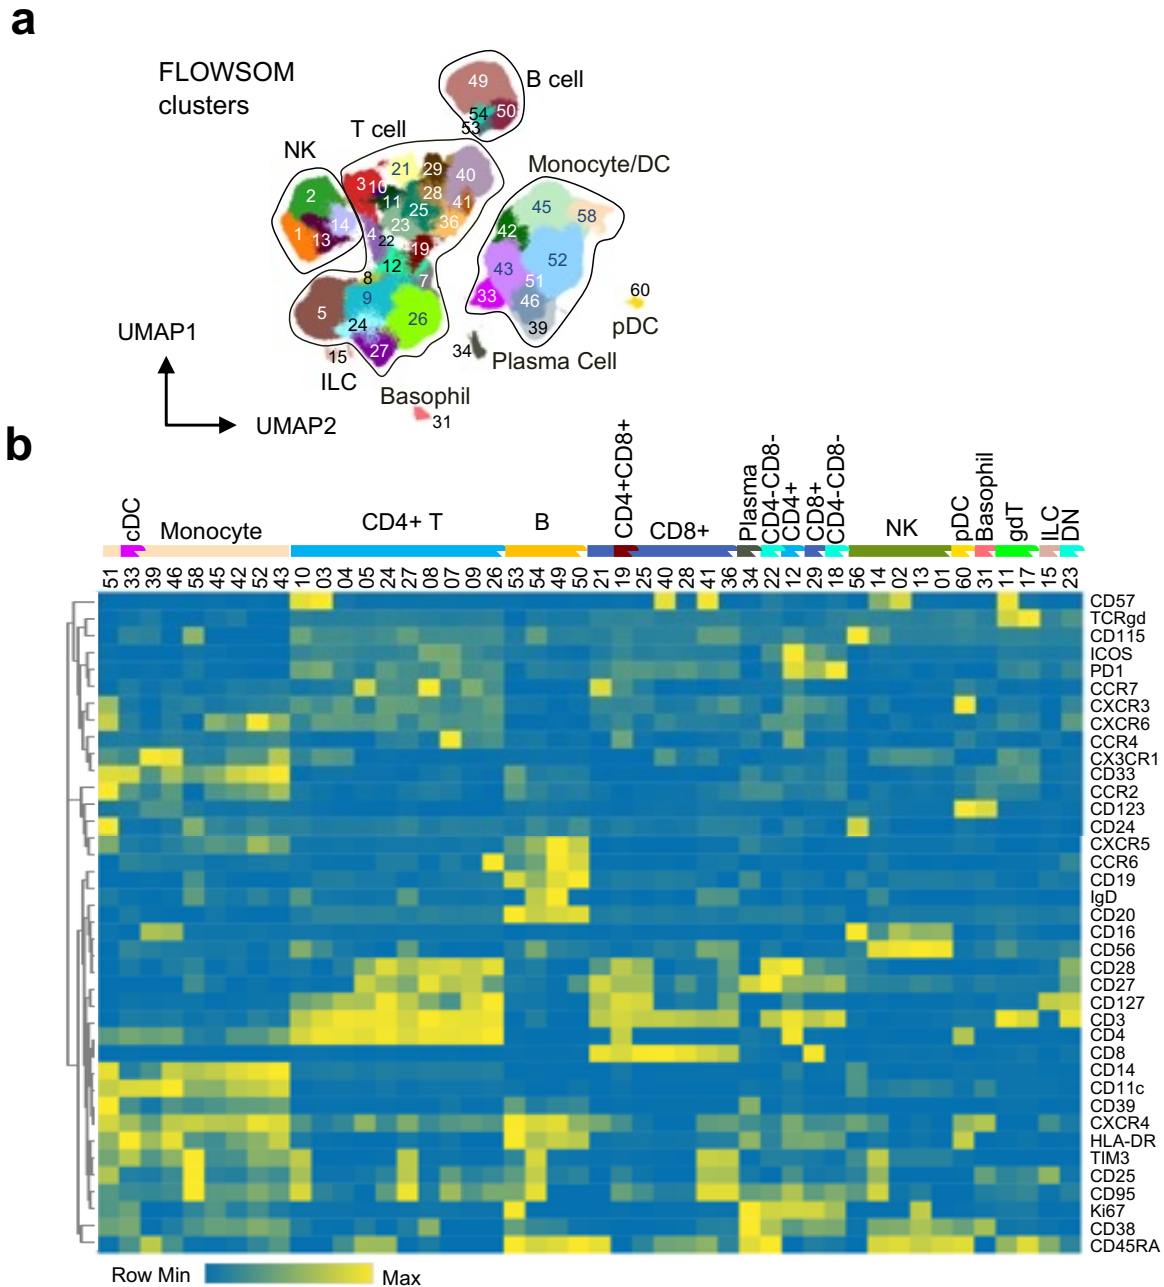

**fig S3: Characterization of blood immune cell subsets by flow cytometry analysis. (A)**

UMAP and unsupervised cluster analysis of PBMC from combined all patient samples from all time points and treatment groups. Major immune cell subsets are marked on the graph. Number of individual clusters is labeled on individual cluster that identified by FLOW SOM. **(B)** Heatmap of selected 38 markers used to phenotyping the immune cell subsets. Expression level was scaled by MFI of individual marker and color coded based on row minimum (Min, blue) and maximum (Max, yellow). Numbers indicate cluster ID and major immune subsets are annotated.

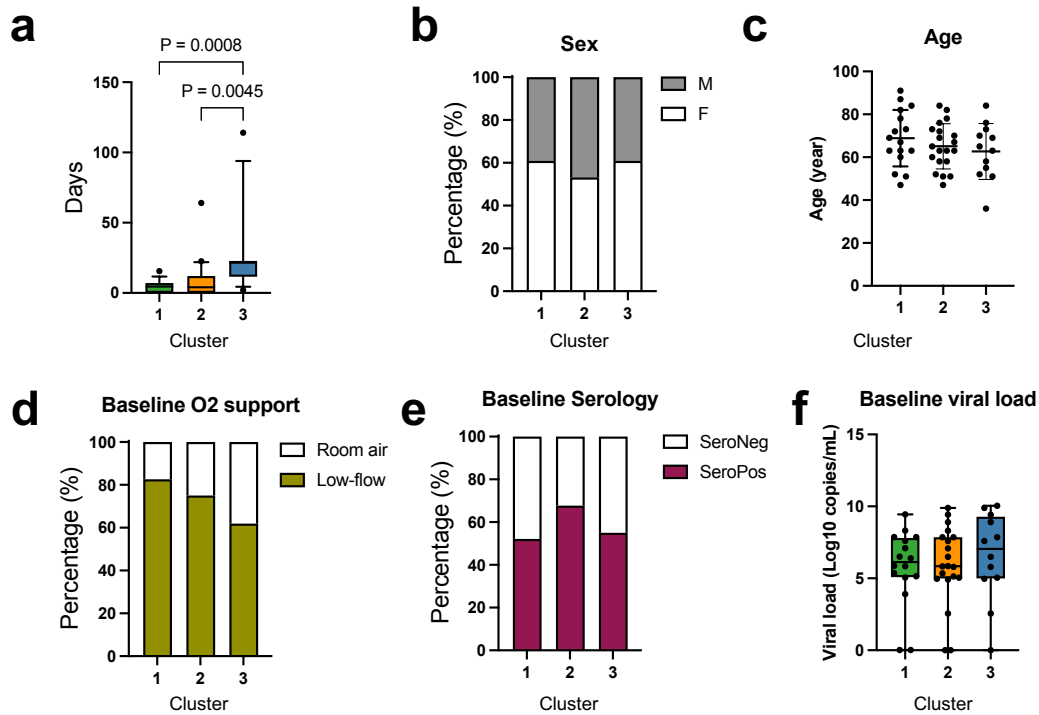

**fig S4: Clinical characteristics of samples from three immunophenotypes.** (A) Sample collection timepoint (in days, baseline day 0) of each immunophenotypes labeled in X-axis. (B) Sex distribution. (C) Age distribution. (D) Baseline O<sub>2</sub> requirement. (E) Baseline serology. (F) Baseline viral load. (Non-parametric Kruskal Wallis test, corrected for multiple comparisons using Dunn's test. \*\*  $P < 0.01$ , \*\*\*  $P < 0.001$ .)

5

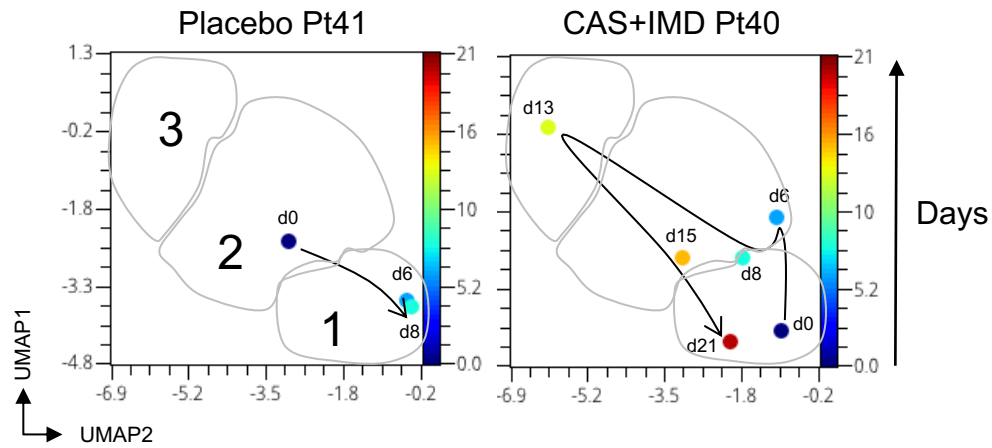

**fig S5: Immunophenotype of longitudinal samples from two deceased patients treated with placebo or CAS+IMD.** UMAP plots showing the samples from indicated patient. Time points of samples were collected are annotated on the graph. Color matrix is corresponding to the time points. Immunophenotype (1-3) are marked on the UMAP.

5

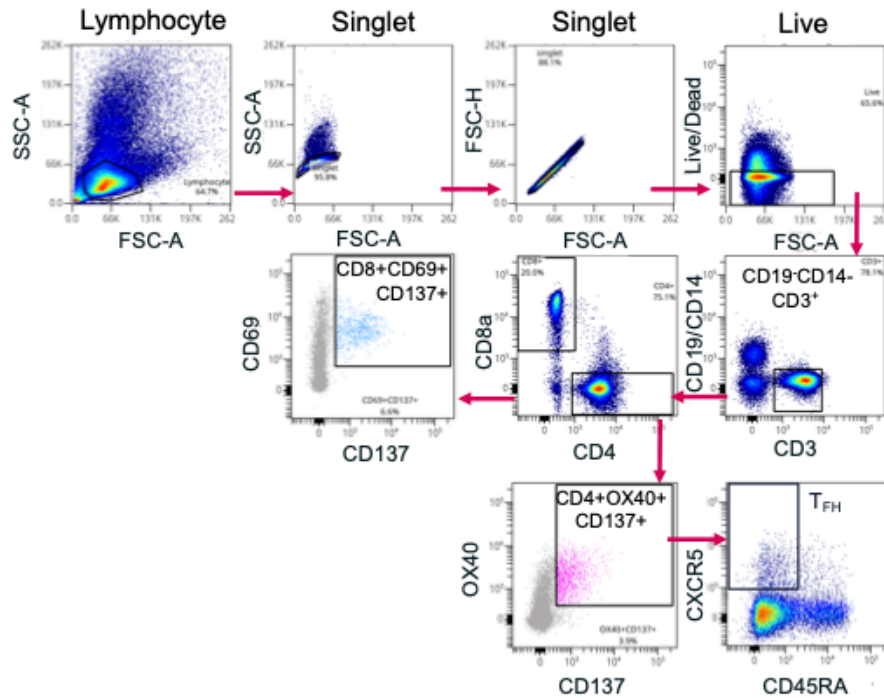

**fig S6: Flow cytometry gating for AIM assay.** Representative gating of viral-specific CD4<sup>+</sup> and CD8<sup>+</sup> T cells. Briefly, mononuclear cells were gated out of total events by subsequent singlet gating. Live cells were gated as Fixable Blue (DAPI channel) negative. T cells were then gated as CD19/CD14 negative and CD3<sup>+</sup> cells. T cells were further gated into either CD8<sup>+</sup> or CD4<sup>+</sup> populations. Antigen-specific CD4<sup>+</sup> T cells were gated on OX40<sup>+</sup>CD137<sup>+</sup> subset (overlaid pink color); antigen-specific CD8<sup>+</sup> T cells were gated on CD69<sup>+</sup>CD137<sup>+</sup> subset (overlaid in blue color).

5

10

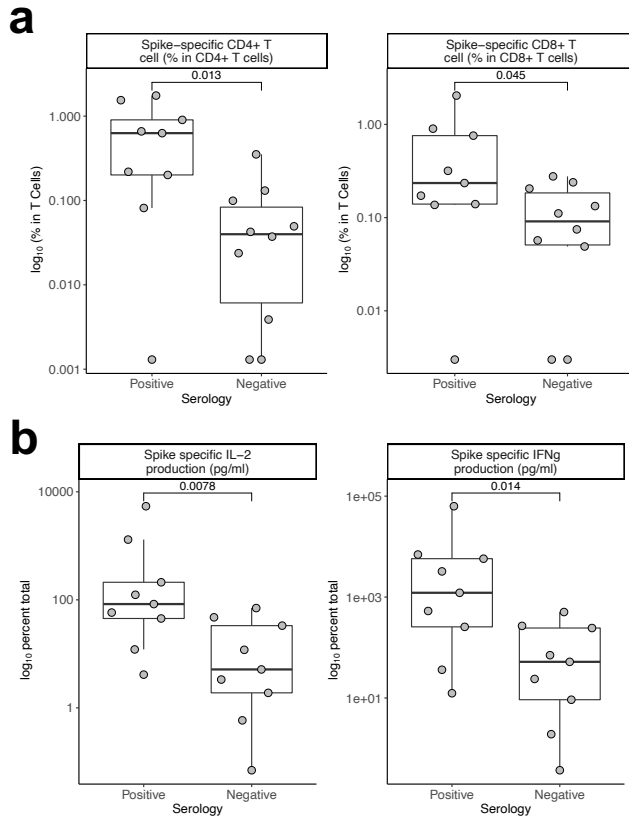

**fig S7: Baseline spike-specific T cell response in seropositive and seronegative patients.** (A). Magnitude of spike-specific CD4<sup>+</sup> and CD8<sup>+</sup> T cell responses from seropositive versus seronegative patients. (B). Spike-specific IL-2 and IFN-g production from AIM assay. Nominal P values are annotated on individual graph.

5



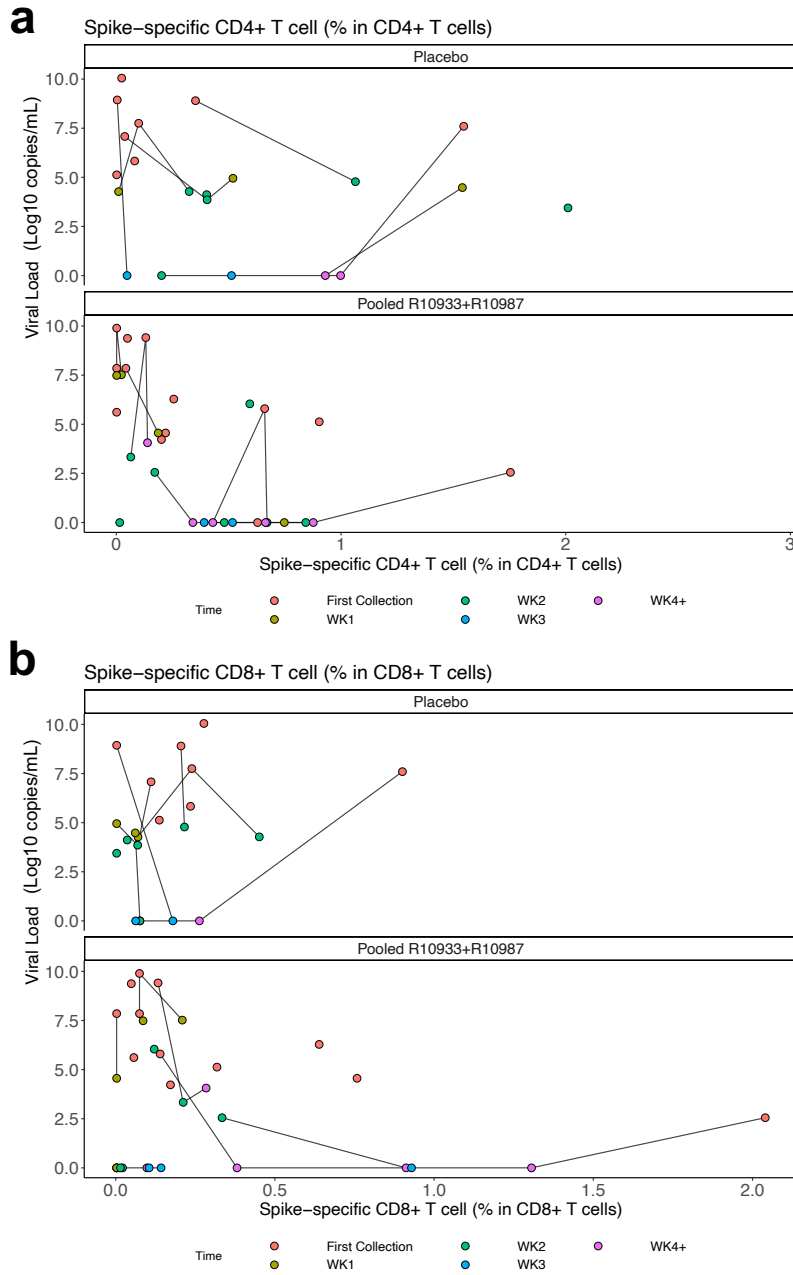

**fig. S8. Correlation of viral load and spike-specific T cell response longitudinally.** Correlation between viral load and spike-specific CD4<sup>+</sup> (A) or CD8<sup>+</sup> T cell responses from different time point (binned in weeks). Lines connecting the samples from the same patient.

5

**Supplementary Table 1. Flow cytometry antibodies**

| Antibody | Vendor        | Clone     | Cat. #        | Conjugate        | Dilution |
|----------|---------------|-----------|---------------|------------------|----------|
| 4-1BB    | BioLegend     | 4B4-1     | 309804        | PE               | 1:20     |
| CCR2     | BD Bioscience | 48607     | 558406        | AF647            | 1:20     |
| CCR4     | BD Bioscience | 1G1       | 624296        | BB790            | 1:100    |
| CCR6     | BD Bioscience | 11A9      | 751515        | BUV615           | 1:25     |
| CCR7     | BD Bioscience | 3D12      | 740052        | BV421            | 1:25     |
| CD115    | BD Bioscience | 9-4D2-1E4 | 565346        | BB515            | 1:20     |
| CD11c    | BD Bioscience | B-ly6     | 624294        | BB630            | 1:200    |
| CD123    | eBioscience   | 6H6       | 62-1239-42    | Super Bright 436 | 1:50     |
| CD127    | Invitrogen    | PCH101    | 15-4776-42    | PE-CY5           | 1:50     |
| CD138    | BD Bioscience | MI15      | 749874        | BUV496           | 1:20     |
| CD14     | BioLegend     | 63D3      | 367148        | Spark Blue 550   | 1:400    |
| CD14     | BioLegend     | 63D3      | 367110        | PerCP/Cyanine5.5 | 1:50     |
| CD16     | BioLegend     | 3G8       | 302036        | BV570            | 1:100    |
| CD19     | BioLegend     | HIB19     | 302270        | Spark NIR 685    | 1:100    |
| CD19     | BioLegend     | HIB19     | 302230        | PerCP/Cyanine5.5 | 1:50     |
| CD20     | Invitrogen    | HI47      | MHCD2030      | Pacific Orange   | 1:25     |
| CD24     | BD Bioscience | ML5       | 751874        | R718             | 1:50     |
| CD25     | Invitrogen    | CD25-3G10 | MHCD2524      | PE-AlexaFluor700 | 1:50     |
| CD27     | BioLegend     | O323      | 302810        | APC              | 1:50     |
| CD28     | BD Bioscience | CD28.2    | 562976        | BV605            | 1:20     |
| CD3      | BioLegend     | UCHT-1    | 300448        | BV510            | 1:50     |
| CD3      | BioLegend     | UCHT-1    | 300436        | BV570            | 1:50     |
| CD33     | BioLegend     | P67.6     | 366616        | PerCP/Cyanine5.5 | 1:200    |
| CD38     | BD Bioscience | HIT2      | 741837        | BUV737           | 1:20     |
| CD38     | BioLegend     | HIT2      | 303550        | APC/Fire810      | 1:100    |
| CD39     | BD Bioscience | TU66      | 749967        | BUV661           | 1:20     |
| CD4      | Biotium       | C4/206    | BNC680206-500 | CF568            | 1:200    |
| CD4      | BioLegend     | T4, Leu3a | 344656        | Spark Blue™ 550  | 1:25     |
| CD45     | BioLegend     | 2D1       | 368506        | PerCP            | 1:50     |
| CD45RA   | BD Bioscience | HI100     | 740298        | BUV395           | 1:100    |
| CD56     | BD Bioscience | NCAM16.2  | 565139        | APC-R700         | 1:100    |
| CD57     | BioLegend     | HNK-1     | 359608        | Pacific Blue     | 1:100    |
| CD66b    | BioLegend     | G10F5     | 984102        | FITC             | 1:50     |
| CD69     | BD Bioscience | FN50      | 563834        | BV786            | 1:20     |
| CD8      | BD Bioscience | RPA-T8    | 749366        | BUV805           | 1:100    |

|        |               |           |            |                 |       |
|--------|---------------|-----------|------------|-----------------|-------|
| CD95   | BioLegend     | DX2       | 305638     | APC/Fire750     | 1:50  |
| CX3CR1 | BD Bioscience | 2A9-1     | 749355     | BUV737          | 1:200 |
| CXCR3  | BD Bioscience | 1C6/CXCR3 | 740603     | BV650           | 1:20  |
| CXCR4  | BioLegend     | 12G5      | 306506     | PE              | 1:100 |
| CXCR5  | BD Bioscience | RF8B2     | 747111     | BV750           | 1:50  |
| CXCR5  | eBioscience   | MU5UBEE   | 15-9185-42 | PE-Cy5          | 1:20  |
| CXCR6  | BD Bioscience | 13B 1E5   | 748450     | BUV563          | 1:20  |
| HLA-DR | BioLegend     | L243      | CUSTOM     | PE Fire 810     | 1:100 |
| HLA-DR | BioLegend     | Tu36      | 361612     | PE-Cy7          | 1:200 |
| ICOS   | BioLegend     | C398.4A   | 313532     | PE/Dazzle594    | 1:400 |
| IgD    | BD Bioscience | IA6-2     | 566138     | BV480           | 1:50  |
| Ki67   | BD Bioscience | B56       | 563755     | BV711           | 1:200 |
| OX40   | BioLegend     | Ber-ACT35 | 350032     | APC/Fire™ 750   | 1:20  |
| PD-1   | BioLegend     | EH12.2H7  | 329930     | BV785           | 1:50  |
| PD-1   | BioLegend     | EH12.2H7  | 329924     | BV605           | 1:50  |
| TCRgd  | Invitrogen    | B1.1      | 46-9959-42 | PerCP-eFluor710 | 1:50  |
| Tim3   | BioLegend     | F38-2E2   | 345014     | PE-CY7          | 1:100 |
|        |               |           |            |                 |       |

**Supplementary Table 2. A complete list of significantly expressed markers or immune cell subsets in each cluster. Provided in a separate excel file.**

**Supplementary Table 3. Proteomics enriched pathway analysis (related to Fig 1C)**

| Pathways                                                             | -LogP      | -Log(q-value) | Number of markers | Marker ratio | Markers                                                                                                                                                              |
|----------------------------------------------------------------------|------------|---------------|-------------------|--------------|----------------------------------------------------------------------------------------------------------------------------------------------------------------------|
| cellular response to cytokine stimulus                               | 18.57      | 14.89         | 26                | 3.616        | CD40,CRKL,CSF1,GBP2,CXCL1,CXCL3,IL5,IL5RA,IL6,CXCL8,IL15,IL15RA,CXCL10,IRAK1,LGALS9,OSM,PDGFB,CCL3,CCL7,CCL23,SHMT1,TFF2,TNFRSF14,TNFRSF11A,SPRY2,LILRB4             |
| leukocyte activation                                                 | 17.19      | 13.76         | 23                | 3.938        | CD40,CD40LG,CD79B,CSF1,CXADR,FKBP1B,HLA-E,IL6,CXCL8,IL15,IL15RA,JUN,MICB,CCL3,LY6D,SKAP2,LAT,SLAMF7,CLEC7A,CEACAM21,MILR1,CLEC4D,MICA                                |
| positive regulation of MAPK cascade                                  | 16.33      | 13.00         | 21                | 4.242        | CD40,CRKL,F2R,HGF,IL6,IRAK1,JUN,LGALS9,OSM,PDGFB,MAP2K6,CCL3,CCL7,CCL23,TGFA,TIMP3,VEGFA,TNFRSF11A,SPRY2,LILRB4,PROK1,TRIM5,CXCL17                                   |
| cell chemotaxis                                                      | 15.26      | 12.10         | 15                | 7.426        | CRKL,CXADR,CXCL1,CXCL3,HGF,IL6,CXCL8,CXCL10,PDGFB,CCL3,CCL7,CCL23,VEGFA,TNFRSF11A,CXCL17                                                                             |
| adaptive immune response                                             | 14.94      | 11.81         | 21                | 3.614        | CD40,CD40LG,CD79B,CTSC,HLA-E,IL6,KLRD1,LAIR1,MICB,TNFRSF14,TNFRSF11A,LILRB4,BTN3A2,TNFRSF13B,LAT,LAMP3,DBNL,SLAMF7,SIGLEC10,CLEC4D,MICA,CXADR,CCL3,MILR1,PTX3,TRIM21 |
| regulation of defense response                                       | 14.64      | 11.53         | 23                | 2.999        | CD40,CTSC,HGF,HLA-E,HSPA1A,IL6,IL15,IRAK1,KLRD1,LGALS9,MICB,OSM,MAP2K6,CCL3,TRIM21,CST7,TNFRSF11A,HEXIM1,CLEC7A,TRIM5,SIGLEC10,CXCL17,MICA                           |
| myeloid leukocyte migration                                          | 14.54      | 11.47         | 13                | 9.286        | CSF1,CXADR,CXCL1,CXCL3,IL6,CXCL8,CXCL10,PDGFB,CCL3,CCL7,CCL23,TNFRSF11A,CXCL17                                                                                       |
| SARS-CoV-2 innate immunity evasion and cell-specific immune response | 8.45085485 | 6.179         | 7                 | 10.606       | CXCL1,CXCL3,IL6,CXCL8,CXCL10,CCL3,CXCL17                                                                                                                             |
| COVID-19 adverse outcome pathway                                     | 6.72033674 | 4.586         | 4                 | 26.667       | IL6,CXCL8,CXCL10,CCL3                                                                                                                                                |

5
